# Supplementary material
Source: MDPI journal article supplement (https://www.mdpi.com/2076-3417/12/12/5769)
Supplement: s1 [file s1]

## Supplementary Information

### Heavy metals in sediments and greater flamingo tissues from a protected saline wetland in Central Spain

Nicolas Valiente<sup>1,\*</sup>, Alexander Pangerl<sup>2</sup>, Juan José Gómez-Alday<sup>3</sup> and Franz Jirsa<sup>2,4</sup>

<sup>1</sup>Division of Terrestrial Ecosystem Research, Center of Microbiology and Environmental Systems Science, University of Vienna, Djerassiplatz 1, 1030, Vienna, Austria

<sup>2</sup>Institute of Inorganic Chemistry, University of Vienna, Waehringer Strasse 42, 1090 Vienna, Austria

<sup>3</sup>Biotechnology and Natural Resources Section, Institute for Regional Development (IDR), University of Castilla–La Mancha (UCLM), Campus Universitario s/n, 02071 Albacete, Spain

<sup>4</sup>Department of Zoology, University of Johannesburg, PO Box 524 Auckland Park, 2006 Johannesburg, South Africa

\* Corresponding author: [nicolas.valiente@univie.ac.at](mailto:nicolas.valiente@univie.ac.at)

#### Contents

Tables S1, S2, S3 and S4

Page 2

**Table S1**

Results of the chemical analyses in sediment samples (concentrations in mg/kg dry weight). Organic matter content (OM, %). M<sub>(Cu, Pb, Zn)</sub>: method used for Cu, Pb and Zn determination. nd: not determined. BLD: below limit of detection.

| Sample | Core | Depth | Control Point | Zone | Date       | Cd    | Hg    | Cu    | Pb   | Zn    | M <sub>(Cu, Pb, Zn)</sub> | OM(%) |
|--------|------|-------|---------------|------|------------|-------|-------|-------|------|-------|---------------------------|-------|
| AA-5   | AA   | 0-5   | 2648          | Lake | 25/09/2014 | 0.018 | BLD   | 2.24  | 8.0  | 19.2  | ICP-OES                   | 3.76  |
| AA-10  | AA   | 5-10  | 2648          | Lake | 25/09/2014 | 0.062 | 0.031 | 4.15  | 10.2 | 24.9  | ICP-OES                   | 4.76  |
| AA-15  | AA   | 10-15 | 2648          | Lake | 25/09/2014 | 0.087 | 0.043 | 8.07  | 56.0 | 32.4  | ICP-OES                   | 20.3  |
| AA-20  | AA   | 15-20 | 2648          | Lake | 25/09/2014 | 0.030 | BLD   | 2.99  | 15.0 | 19.7  | ICP-OES                   | 6.55  |
| AA-25  | AA   | 20-25 | 2648          | Lake | 25/09/2014 | 0.033 | 0.013 | 2.74  | 10.7 | 33.4  | ICP-OES                   | 5.39  |
| AB-5   | AB   | 0-5   | 2648          | Lake | 25/09/2014 | 0.021 | BLD   | 6.69  | 9.1  | 26.8  | ICP-OES                   | 6.50  |
| AB-10  | AB   | 5-10  | 2648          | Lake | 25/09/2014 | 0.076 | 0.030 | 7.48  | 53.5 | 44.5  | ICP-OES                   | 11.8  |
| AB-15  | AB   | 10-15 | 2648          | Lake | 25/09/2014 | 0.039 | 0.047 | 9.59  | 50.2 | 43.6  | ICP-OES                   | 21.4  |
| AB-20  | AB   | 15-20 | 2648          | Lake | 25/09/2014 | 0.033 | 0.011 | 2.98  | 10.7 | 26.6  | ICP-OES                   | 5.39  |
| AB-25  | AB   | 20-25 | 2648          | Lake | 25/09/2014 | nd    | 0.040 | 10.46 | 69.8 | 39.6  | ICP-OES                   | 15.0  |
| AC-5   | AC   | 0-5   | 2648          | Lake | 25/09/2014 | 0.025 | BLD   | 1.77  | 4.9  | 11.6  | ICP-OES                   | 3.05  |
| AC-10  | AC   | 5-10  | 2648          | Lake | 25/09/2014 | 0.028 | BLD   | 2.50  | 10.5 | 11.3  | ICP-OES                   | 4.10  |
| AC-15  | AC   | 10-15 | 2648          | Lake | 25/09/2014 | 0.087 | 0.026 | 9.62  | 79.4 | 45.4  | ICP-OES                   | 13.8  |
| AC-20  | AC   | 15-20 | 2648          | Lake | 25/09/2014 | 0.064 | 0.039 | 11.98 | 86.0 | 45.3  | ICP-OES                   | 17.6  |
| AC-25  | AC   | 20-25 | 2648          | Lake | 25/09/2014 | 0.044 | 0.054 | 9.54  | 58.2 | 33.4  | ICP-OES                   | 20.4  |
| AD-5   | AD   | 0-5   | 2648          | Lake | 25/09/2014 | 0.032 | 0.008 | 4.59  | 8.8  | 28.7  | ICP-OES                   | 3.19  |
| AD-10  | AD   | 5-10  | 2648          | Lake | 25/09/2014 | 0.023 | 0.030 | 7.97  | 48.5 | 33.0  | ICP-OES                   | 12.8  |
| AD-15  | AD   | 10-15 | 2648          | Lake | 25/09/2014 | 0.034 | 0.041 | 9.35  | 74.3 | 28.5  | ICP-OES                   | 16.3  |
| AD-20  | AD   | 15-20 | 2648          | Lake | 25/09/2014 | 0.027 | 0.028 | 6.68  | 44.8 | 24.9  | ICP-OES                   | 12.7  |
| AD-25  | AD   | 20-25 | 2648          | Lake | 25/09/2014 | 0.033 | 0.018 | 6.21  | 38.2 | 30.9  | ICP-OES                   | 6.56  |
| AE-5   | AE   | 0-5   | 2648          | Lake | 25/09/2014 | 0.056 | 0.045 | 13.97 | 85.9 | 38.3  | ICP-OES                   | 19.0  |
| AE-10  | AE   | 5-10  | 2648          | Lake | 25/09/2014 | 0.046 | 0.017 | 6.84  | 27.2 | 24.4  | ICP-OES                   | 7.71  |
| AE-15  | AE   | 10-15 | 2648          | Lake | 25/09/2014 | 0.025 | 0.031 | 6.37  | 34.0 | 21.1  | ICP-OES                   | 12.1  |
| AE-20  | AE   | 15-20 | 2648          | Lake | 25/09/2014 | 0.061 | 0.028 | 7.30  | 71.0 | 29.1  | ICP-OES                   | 12.3  |
| AE-25  | AE   | 20-25 | 2648          | Lake | 25/09/2014 | 0.022 | 0.009 | 2.36  | 15.1 | 17.8  | ICP-OES                   | 4.48  |
| AF-5   | AF   | 0-5   | 2648          | Lake | 18/12/2014 | 0.063 | 0.018 | 6.01  | 26.3 | 25.7  | ICP-OES                   | 13.9  |
| AF-10  | AF   | 5-10  | 2648          | Lake | 18/12/2014 | 0.068 | 0.022 | 8.00  | 35.1 | 30.1  | ICP-OES                   | 12.0  |
| AF-15  | AF   | 10-15 | 2648          | Lake | 18/12/2014 | 0.068 | 0.017 | 12.78 | 22.6 | 161.5 | ICP-OES                   | 7.86  |
| AF-20  | AF   | 15-20 | 2648          | Lake | 18/12/2014 | 0.029 | 0.011 | 4.49  | 23.7 | 28.0  | ICP-OES                   | 7.11  |
| AF-25  | AF   | 20-25 | 2648          | Lake | 18/12/2014 | 0.072 | 0.026 | 8.41  | 40.7 | 28.6  | ICP-OES                   | 10.2  |
| AF-30  | AF   | 25-30 | 2648          | Lake | 18/12/2014 | 0.043 | 0.017 | 6.68  | 33.2 | 27.2  | ICP-OES                   | 9.47  |
| AG-5   | AG   | 0-5   | 2648          | Lake | 18/12/2014 | 0.026 | BLD   | 2.01  | 9.2  | 17.3  | ICP-OES                   | 3.92  |
| AG-10  | AG   | 5-10  | 2648          | Lake | 18/12/2014 | 0.029 | BLD   | 2.73  | 14.6 | 16.6  | ICP-OES                   | 5.34  |
| AG-15  | AG   | 10-15 | 2648          | Lake | 18/12/2014 | 0.064 | 0.015 | 6.75  | 30.0 | 23.7  | ICP-OES                   | 10.2  |
| AG-20  | AG   | 15-20 | 2648          | Lake | 18/12/2014 | 0.067 | 0.018 | 7.29  | 53.7 | 27.5  | ICP-OES                   | 15.9  |

| Sample | Core | Depth | Control Point | Zone        | Date       | Cd    | Hg    | Cu    | Pb    | Zn    | M <sub>(Cu, Pb, Zn)</sub> | OC(%) |
|--------|------|-------|---------------|-------------|------------|-------|-------|-------|-------|-------|---------------------------|-------|
| AG-25  | AG   | 20-25 | 2648          | Lake        | 18/12/2014 | 0.032 | BLD   | 5.26  | 14.0  | 22.6  | ICP-OES                   | 6.88  |
| AG-30  | AG   | 25-30 | 2648          | Lake        | 18/12/2014 | 0.050 | 0.015 | 5.90  | 30.4  | 33.0  | ICP-OES                   | 8.79  |
| AH-5   | AH   | 0-5   | 2648          | Lake        | 18/12/2014 | 0.047 | BLD   | 2.79  | 19.3  | 18.1  | ICP-OES                   | 5.33  |
| AH-10  | AH   | 5-10  | 2648          | Lake        | 18/12/2014 | 0.039 | 0.014 | 5.12  | 40.7  | 26.6  | ICP-OES                   | 10.4  |
| AH-15  | AH   | 10-15 | 2648          | Lake        | 18/12/2014 | 0.032 | 0.050 | 7.80  | 43.2  | 29.3  | ICP-OES                   | 19.9  |
| AH-20  | AH   | 15-20 | 2648          | Lake        | 18/12/2014 | 0.053 | 0.032 | 6.54  | 26.6  | 29.7  | ICP-OES                   | 16.0  |
| AH-25  | AH   | 20-25 | 2648          | Lake        | 18/12/2014 | 0.041 | 0.015 | 4.16  | 28.5  | 18.8  | ICP-OES                   | 10.1  |
| AI-5   | AI   | 0-5   | 2648          | Lake        | 18/12/2014 | 0.045 | BLD   | 3.00  | 16.9  | 18.2  | ICP-OES                   | 5.91  |
| AI-10  | AI   | 5-10  | 2648          | Lake        | 18/12/2014 | 0.079 | 0.031 | 11.74 | 91.4  | 40.8  | ICP-OES                   | 18.2  |
| AI-15  | AI   | 10-15 | 2648          | Lake        | 18/12/2014 | 0.089 | 0.038 | 11.18 | 97.8  | 49.6  | ICP-OES                   | 15.0  |
| AI-20  | AI   | 15-20 | 2648          | Lake        | 18/12/2014 | 0.055 | 0.088 | 4.45  | 19.9  | 15.1  | ICP-OES                   | 5.05  |
| AJ-5   | AJ   | 0-5   | 2648          | Lake        | 07/04/2015 | 0.021 | BLD   | 0.64  | 6.8   | 6.2   | ICP-OES                   | 5.00  |
| AJ-10  | AJ   | 5-10  | 2648          | Lake        | 07/04/2015 | 0.043 | 0.008 | 1.95  | 19.2  | 7.4   | ICP-OES                   | 5.51  |
| AJ-15  | AJ   | 10-15 | 2648          | Lake        | 07/04/2015 | 0.056 | 0.015 | 4.13  | 28.7  | 12.5  | ICP-OES                   | 11.4  |
| AJ-20  | AJ   | 15-20 | 2648          | Lake        | 07/04/2015 | 0.072 | 0.021 | 5.49  | 45.0  | 17.7  | ICP-OES                   | 14.6  |
| AJ-25  | AJ   | 20-25 | 2648          | Lake        | 07/04/2015 | 0.070 | 0.025 | 4.68  | 37.2  | 16.1  | ICP-OES                   | 11.9  |
| AK-5   | AK   | 0-5   | 2649          | Lake        | 07/04/2015 | 0.014 | BLD   | 1.20  | 17.2  | 7.4   | ICP-OES                   | 4.68  |
| AK-10  | AK   | 5-10  | 2649          | Lake        | 07/04/2015 | 0.038 | 0.010 | 2.96  | 30.6  | 9.7   | ICP-OES                   | 7.26  |
| AK-15  | AK   | 10-15 | 2649          | Lake        | 07/04/2015 | 0.031 | 0.009 | 2.30  | 24.9  | 8.7   | ICP-OES                   | 8.77  |
| AK-20  | AK   | 15-20 | 2649          | Lake        | 07/04/2015 | 0.036 | 0.012 | 3.46  | 31.6  | 11.2  | ICP-OES                   | 9.16  |
| AL-5   | AL   | 0-5   | 2650          | Lake        | 07/04/2015 | 0.174 | 0.177 | 24.78 | 110.9 | 97.9  | ICP-OES                   | 17.3  |
| AL-10  | AL   | 5-10  | 2650          | Lake        | 07/04/2015 | 0.283 | 0.251 | 29.63 | 84.2  | 118.0 | ICP-OES                   | 18.3  |
| AL-15  | AL   | 10-15 | 2650          | Lake        | 07/04/2015 | 0.151 | 0.179 | 17.90 | 94.4  | 60.7  | ICP-OES                   | 10.4  |
| AL-20  | AL   | 15-20 | 2650          | Lake        | 07/04/2015 | 0.118 | 0.232 | 14.57 | 68.4  | 41.0  | ICP-OES                   | 7.24  |
| AM-5   | AM   | 0-5   | 2651          | Lake        | 07/04/2015 | 0.030 | 0.008 | 1.06  | 12.1  | 4.6   | ICP-OES                   | 9.10  |
| AM-10  | AM   | 5-10  | 2651          | Lake        | 07/04/2015 | 0.032 | BLD   | 0.64  | 10.2  | 4.5   | ICP-OES                   | 5.01  |
| AM-15  | AM   | 10-15 | 2651          | Lake        | 07/04/2015 | 0.026 | BLD   | 1.17  | 6.7   | 7.2   | ICP-OES                   | 4.32  |
| AM-20  | AM   | 15-20 | 2651          | Lake        | 07/04/2015 | 0.036 | BLD   | 0.89  | 5.7   | 7.5   | ICP-OES                   | 4.00  |
| AM-25  | AM   | 20-25 | 2651          | Lake        | 07/04/2015 | 0.041 | BLD   | 1.58  | 6.4   | 9.6   | ICP-OES                   | 4.96  |
| AN-5   | AN   | 0-5   | 2652          | Lake        | 07/04/2015 | 0.057 | 0.029 | 5.01  | 49.2  | 14.7  | ICP-OES                   | 10.0  |
| AN-10  | AN   | 5-10  | 2652          | Lake        | 07/04/2015 | 0.089 | 0.022 | 7.41  | 74.3  | 21.8  | ICP-OES                   | 11.2  |
| AN-15  | AN   | 10-15 | 2652          | Lake        | 07/04/2015 | 0.189 | 0.047 | 16.15 | 202.4 | 49.3  | ICP-OES                   | 11.9  |
| AO-5   | AO   | 0-5   | 2554          | Dryland     | 24/07/2015 | 0.086 | 0.012 | 3.49  | 16.3  | 17.9  | TXRF                      | 17.2  |
| AP-5   | AP   | 0-5   | 2602          | Irrigation  | 24/07/2015 | 0.084 | 0.030 | 8.80  | 15.2  | 22.8  | TXRF                      | 10.6  |
| AQ-5   | AQ   | 0-5   | 2571          | Irrigation  | 24/07/2015 | 0.141 | 0.012 | 5.17  | 11.0  | 21.1  | TXRF                      | 6.02  |
| AR-5   | AR   | 0-5   | 2641          | Wastewaters | 24/07/2015 | 0.047 | 0.032 | 4.95  | 16.3  | 31.7  | TXRF                      | 8.01  |
| AS-5   | AS   | 0-5   | 2635          | Lake        | 27/07/2015 | 0.022 | BLD   | 2.87  | 3.1   | 9.4   | TXRF                      | 14.6  |

| Sample | Core | Depth | Control Point | Zone        | Date       | Cd    | Hg    | Cu    | Pb   | Zn   | M <sub>(Cu, Pb, Zn)</sub> | OC(%) |
|--------|------|-------|---------------|-------------|------------|-------|-------|-------|------|------|---------------------------|-------|
| AT-5   | AT   | 0-5   | 2643          | Lake        | 27/07/2015 | 0.022 | BLD   | 2.77  | 8.0  | 16.6 | TXRF                      | 8.20  |
| AU-5   | AU   | 0-5   | 2648          | Lake        | 27/07/2015 | 0.019 | 0.012 | 3.09  | 4.1  | 5.5  | TXRF                      | 13.7  |
| AV-5   | AV   | 0-5   | 2649          | Lake        | 27/07/2015 | 0.026 | 0.030 | 5.04  | 5.0  | 25.3 | TXRF                      | 30.4  |
| AW-5   | AW   | 0-5   | 2652          | Lake        | 27/07/2015 | 0.075 | 0.033 | 8.03  | 16.7 | 32.0 | TXRF                      | 14.3  |
| AX-5   | AX   | 0-5   | 2651          | Lake        | 27/07/2015 | 0.022 | BLD   | 2.74  | 4.9  | 14.0 | TXRF                      | 6.67  |
| AX-10  | AX   | 5-10  | 2651          | Lake        | 27/07/2015 | 0.054 | 0.025 | 8.08  | 9.8  | 31.0 | TXRF                      | 20.5  |
| AX-15  | AX   | 10-15 | 2651          | Lake        | 27/07/2015 | 0.037 | 0.025 | 5.45  | 9.5  | 17.6 | TXRF                      | 19.7  |
| AX-20  | AX   | 15-20 | 2651          | Lake        | 27/07/2015 | 0.037 | 0.016 | 3.66  | 5.0  | 11.9 | TXRF                      | 13.1  |
| AY-5   | AY   | 0-5   | 2651          | Lake        | 27/07/2015 | BLD   | BLD   | 4.01  | 4.1  | 3.9  | TXRF                      | 10.7  |
| AY-10  | AY   | 5-10  | 2651          | Lake        | 27/07/2015 | 0.024 | BLD   | 2.89  | 6.7  | 17.6 | TXRF                      | 8.07  |
| AY-15  | AY   | 10-15 | 2651          | Lake        | 27/07/2015 | 0.069 | 0.032 | 7.91  | 18.0 | 27.5 | TXRF                      | 23.2  |
| AY-20  | AY   | 15-20 | 2651          | Lake        | 27/07/2015 | 0.043 | 0.020 | 6.09  | 11.1 | 31.6 | TXRF                      | 19.4  |
| AZ-5   | AZ   | 0-5   | 2651          | Lake        | 27/07/2015 | 0.018 | BLD   | 2.83  | 1.9  | 21.8 | TXRF                      | 8.09  |
| AZ-10  | AZ   | 5-10  | 2651          | Lake        | 27/07/2015 | 0.055 | 0.029 | 7.49  | 10.8 | 30.4 | TXRF                      | 20.3  |
| AZ-15  | AZ   | 10-15 | 2651          | Lake        | 27/07/2015 | 0.028 | 0.026 | 5.86  | 5.2  | 16.9 | TXRF                      | 21.1  |
| AZ-20  | AZ   | 15-20 | 2651          | Lake        | 27/07/2015 | 0.035 | 0.023 | 4.73  | 6.7  | 17.2 | TXRF                      | 15.4  |
| BA-5   | BA   | 0-5   | 2554          | Dryland     | 14/01/2016 | 0.051 | BLD   | 2.10  | 3.3  | 8.8  | TXRF                      | 5.30  |
| BB-5   | BB   | 0-5   | 2571          | Irrigation  | 14/01/2016 | 0.130 | 0.016 | 6.69  | 10.5 | 26.0 | TXRF                      | 8.39  |
| BC-5   | BC   | 0-5   | 2575          | Wastewaters | 14/01/2016 | 0.097 | 0.025 | 8.46  | 22.9 | 24.1 | TXRF                      | 4.50  |
| BD-5   | BD   | 0-5   | 2602          | Irrigation  | 14/01/2016 | 0.213 | 0.030 | 15.40 | 19.2 | 50.7 | TXRF                      | 7.67  |
| BE-5   | BE   | 0-5   | 2640          | Dryland     | 14/01/2016 | 0.134 | 0.026 | 12.03 | 12.1 | 36.6 | TXRF                      | 10.5  |
| BF-5   | BF   | 0-5   | 2641          | Wastewaters | 14/01/2016 | 0.084 | 0.054 | 9.57  | 19.1 | 32.0 | TXRF                      | 15.2  |
| BG-5   | BG   | 0-5   | 2642          | Dryland     | 14/01/2016 | 0.127 | 0.026 | 11.57 | 16.9 | 42.0 | TXRF                      | 8.81  |
| BH-5   | BH   | 0-5   | 2635          | Lake        | 14/01/2016 | 0.023 | BLD   | 2.06  | 5.7  | 11.1 | TXRF                      | 7.69  |
| BI-5   | BI   | 0-5   | 2643          | Lake        | 14/01/2016 | 0.021 | 0.010 | 2.47  | 2.7  | 8.2  | TXRF                      | 12.4  |
| BJ-5   | BJ   | 0-5   | 2648          | Lake        | 14/01/2016 | 0.029 | 0.011 | 3.02  | 5.1  | 11.0 | TXRF                      | 8.81  |
| BK-5   | BK   | 0-5   | 2649          | Lake        | 14/01/2016 | 0.018 | 0.011 | 2.28  | 2.9  | 16.5 | TXRF                      | 11.0  |
| BL-5   | BL   | 0-5   | 2650          | Lake        | 14/01/2016 | 0.160 | 0.058 | 17.48 | 21.1 | 89.5 | TXRF                      | 21.9  |
| BM-5   | BM   | 0-5   | 2651          | Lake        | 14/01/2016 | 0.020 | BLD   | 0.95  | 0.9  | 4.2  | TXRF                      | 3.38  |
| BN-5   | BN   | 0-5   | 2652          | Lake        | 14/01/2016 | 0.025 | BLD   | 2.05  | 4.2  | 10.0 | TXRF                      | 4.05  |

**Table S2** Concentrations of Cu, Pb, and Zn found in the chemical speciation fractions F1-F6 for the sediment samples. All concentrations are given in mg/kg dry weight. F1: exchangeable fraction. F2: fraction bound to carbonates. F3: fraction bound to Mn oxides. F4: fraction bound to organic matter. F5: fraction bound to Fe oxides. F6: residual fraction. BLD: below limit of detection.

| Control Point | 2554 | 2571 | 2575 | 2602 | 2640  | 2641 | 2642 | 2635 | 2643 | 2648 | 2649 | 2650 | 2651 | 2652 |      |
|---------------|------|------|------|------|-------|------|------|------|------|------|------|------|------|------|------|
| Sample        | BA-5 | BB-5 | BC-5 | BD-5 | BE-5  | BF-5 | BG-5 | BH-5 | BI-5 | BJ-5 | BK-5 | BL-5 | BM-5 | BN-5 |      |
| F1            | Cu   | BLD  | BLD  | BLD  | BLD   | BLD  | 2.50 | BLD  | BLD  | BLD  | BLD  | 3.81 | BLD  | BLD  | BLD  |
|               | Pb   | BLD  | BLD  | BLD  | BLD   | BLD  | BLD  | BLD  | BLD  | BLD  | BLD  | BLD  | BLD  | BLD  | BLD  |
|               | Zn   | BLD  | 1.01 | 1.19 | 1.29  | 1.86 | 3.62 | 1.48 | 2.64 | BLD  | 2.20 | 4.83 | 3.07 | BLD  | 3.58 |
| F2            | Cu   | BLD  | BLD  | 2.08 | 1.37  | BLD  | BLD  | 1.13 | 1.83 | 1.45 | 0.64 | 1.06 | BLD  | BLD  | BLD  |
|               | Pb   | BLD  | BLD  | 2.00 | 1.53  | 2.44 | BLD  | 3.32 | BLD  | BLD  | 1.20 | BLD  | BLD  | BLD  | BLD  |
|               | Zn   | 1.12 | 2.09 | 7.53 | 3.31  | 3.09 | 2.92 | 3.08 | 4.38 | 1.77 | 1.36 | 3.09 | 22.7 | 16.9 | 2.49 |
| F3            | Cu   | 0.40 | 1.61 | 2.32 | 2.18  | BLD  | 0.89 | 0.57 | BLD  | 0.48 | 0.48 | 5.44 | 0.78 | BLD  | 0.80 |
|               | Pb   | BLD  | 1.77 | 2.72 | 4.03  | BLD  | 2.68 | 2.19 | BLD  | 0.97 | BLD  | 0.49 | 1.91 | BLD  | BLD  |
|               | Zn   | 4.30 | 3.62 | 2.48 | 6.29  | 17.1 | 6.74 | 9.56 | 1.99 | 18.2 | 2.48 | 8.69 | 11.8 | 1.39 | 1.69 |
| F4            | Cu   | BLD  | 0.89 | 0.80 | 1.37  | 1.30 | BLD  | BLD  | BLD  | BLD  | BLD  | BLD  | 0.50 | BLD  | BLD  |
|               | Pb   | BLD  | BLD  | BLD  | BLD   | 0.57 | 3.33 | BLD  | 1.03 | 1.21 | BLD  | 0.89 | 4.03 | BLD  | 1.04 |
|               | Zn   | 1.04 | 2.25 | 12.5 | 2.26  | 1.63 | 1.70 | 2.67 | 0.80 | 0.64 | 1.12 | 2.52 | 12.7 | BLD  | 1.61 |
| F5            | Cu   | BLD  | BLD  | BLD  | 1.29  | BLD  |
|               | Pb   | BLD  | BLD  | BLD  | 0.24  | 0.33 | 0.81 | BLD  | 0.48 | 0.40 | BLD  | 0.57 | 2.41 | BLD  | BLD  |
|               | Zn   | 5.42 | 6.52 | 7.13 | 11.45 | 5.29 | 6.33 | 6.24 | 9.79 | 6.52 | 6.65 | 7.88 | 19.9 | 6.45 | 6.02 |
| F6            | Cu   | 0.75 | 6.42 | 4.80 | 7.81  | 7.82 | 5.50 | 7.02 | 1.30 | 1.45 | 1.72 | 0.63 | 10.4 | 0.56 | 1.03 |
|               | Pb   | 0.82 | 9.25 | 5.77 | 5.39  | 6.77 | 189  | 7.99 | 0.61 | 1.93 | 1.65 | BLD  | 14.3 | BLD  | 0.48 |
|               | Zn   | 2.87 | 25.0 | 22.4 | 25.0  | 34.4 | 31.7 | 57.9 | 6.62 | 4.76 | 5.70 | 3.27 | 37.4 | 6.65 | 4.33 |

**Table S3** Results of the chemical analyses in flamingo tissue samples (concentrations in mg/kg dry weight). BLD: below limit of detection.

| Sample | Flamingo | Tissue | Cd    | Hg    | Cu   | Pb    | Zn   |
|--------|----------|--------|-------|-------|------|-------|------|
| H-A    | A        | Liver  | 0.767 | 0.634 | 12.6 | 0.251 | 198  |
| H-B    | B        | Liver  | 0.288 | 0.733 | 9.97 | 0.143 | 243  |
| H-C    | C        | Liver  | 0.345 | 0.284 | 12.9 | 0.143 | 248  |
| H-D    | D        | Liver  | 0.007 | 0.206 | 8.53 | 0.044 | 263  |
| H-E    | E        | Liver  | 0.007 | 0.137 | 17.5 | 0.087 | 298  |
| H-F    | F        | Liver  | 0.017 | 0.710 | 79.5 | 0.424 | 608  |
| H-G    | G        | Liver  | 0.007 | 0.089 | 23.4 | 0.065 | 297  |
| H-H    | H        | Liver  | 0.006 | 0.379 | 12.5 | 0.065 | 286  |
| H-I    | I        | Liver  | 0.011 | 0.255 | 84.9 | 0.154 | 263  |
| H-J    | J        | Liver  | 1.881 | 1.805 | 58.4 | 0.313 | 1124 |
| H-L    | L        | Liver  | 0.009 | 0.640 | 59.9 | 0.076 | 378  |
| M-A    | A        | Muscle | 0.029 | 0.168 | 41.3 | 0.052 | 43.1 |
| M-B    | B        | Muscle | 0.020 | 0.130 | 26.4 | 0.012 | 51.8 |
| M-C    | C        | Muscle | 0.021 | 0.048 | 32.3 | 0.023 | 43.8 |
| M-D    | D        | Muscle | 0.003 | 0.027 | 6.91 | 0.038 | 43.5 |
| M-E    | E        | Muscle | 0.002 | 0.012 | 9.27 | 0.019 | 33.0 |
| M-F    | F        | Muscle | 0.001 | 0.113 | 8.47 | 0.013 | 59.3 |
| M-G    | G        | Muscle | 0.004 | 0.009 | 5.86 | 0.026 | 45.4 |
| M-H    | H        | Muscle | 0.005 | 0.062 | 9.12 | 0.018 | 51.5 |
| M-I    | I        | Muscle | 0.001 | 0.066 | 18.5 | 0.006 | 68.7 |
| M-J    | J        | Muscle | 0.329 | 0.206 | 78.0 | 0.048 | 126  |
| M-K    | K        | Muscle | 0.063 | 0.137 | 29.7 | 0.016 | 69.9 |
| M-L    | L        | Muscle | 0.005 | 0.082 | 22.7 | 0.025 | 38.0 |
| F-D    | D        | Fat    | 0.007 | BLD   | BLD  | 0.127 | 11.4 |
| F-E    | E        | Fat    | 0.002 | BLD   | BLD  | 0.033 | 15.1 |
| F-G    | G        | Fat    | 0.007 | BLD   | BLD  | 0.036 | 23.4 |
| F-H    | H        | Fat    | 0.016 | BLD   | 3.25 | 0.129 | 9.13 |
| F-L    | L        | Fat    | 0.005 | BLD   | BLD  | 0.049 | 10.9 |

**Table S4** Pearson correlation analysis among total concentrations of heavy metals and organic matter content in lake sediment samples (n=102) and flamingo tissue samples (n=28).

|     | Cd     | Cu     | Hg     | Pb      | Zn     | OM% |
|-----|--------|--------|--------|---------|--------|-----|
| Cd  | 1      |        |        |         |        |     |
| Cu  | 0.353* | 1      |        |         |        |     |
| Hg  | 0.347* | 0.649* | 1      |         |        |     |
| Pb  | 0.515* | 0.108  | -0.146 | 1       |        |     |
| Zn  | 0.232* | 0.541* | 0.786* | -0.326* | 1      |     |
| OM% | 0.277* | 0.629* | 0.645* | 0.404*  | 0.439* | 1   |

\* Correlations significant at  $p < 0.05$ .
